# Supplementary material for: Liquid Metal Patterned Stretchable and Soft Capacitive Sensor with Enhanced Dielectric Property Enabled by Graphite Nanofiber Fillers
Source: MDPI journal article supplement (doi:10.3390/polym14040710), 2022-02-12
Supplement: s1 [file s1]

Supplementary Materials

# Liquid Metal Patterned Stretchable and Soft Capacitive Sensor with Enhanced Dielectric Property Enabled by Graphite Nanofiber Fillers

Priyanuj Bhuyan <sup>1,2</sup>, Dongkyun Cho <sup>1,2</sup>, Minjae Choe <sup>1,2</sup>, Sangmin Lee <sup>1,2</sup> and Sungjune Park <sup>1,2,\*</sup>

<sup>1</sup> Department of Nano Convergence Engineering, Jeonbuk National University, Jeonju 54896, Korea; priyanuj.bhuyan@jbnu.ac.kr (P.B.); xwcerl8559@jbnu.ac.kr (D.C.); chzhgk6@jbnu.ac.kr (M.C.); rptdpa0503@jbnu.ac.kr (S.L.)

<sup>2</sup> Department of Polymer-Nano Science and Technology, Jeonbuk National University, Jeonju 54896, Korea

\* Correspondence: s.park@jbnu.ac.kr

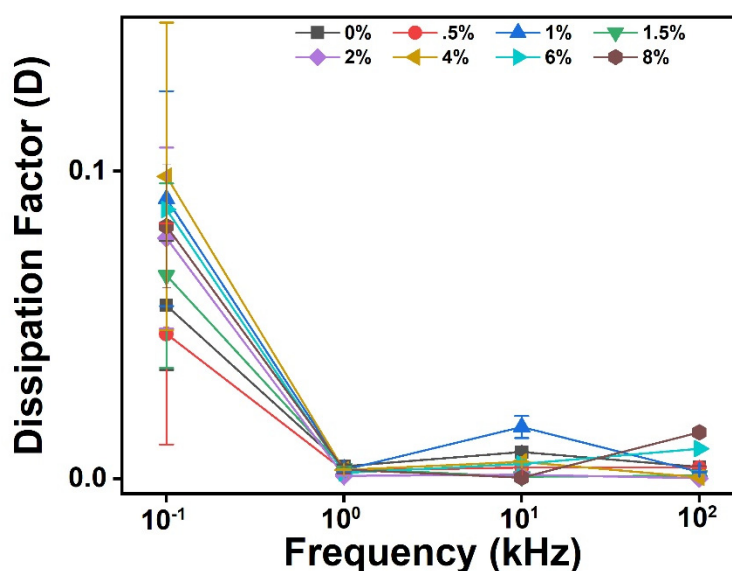

Figure S1. Plot of dissipation factor (D) of PGNCs versus testing frequencies up to 8 wt % GNF.

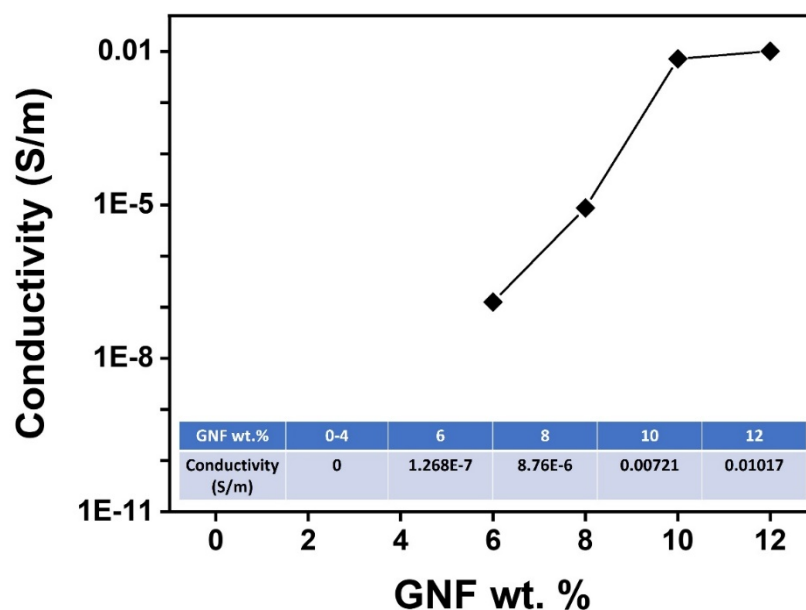

Figure S2. DC conductivity of PGNCs with different loadings of GNF fillers.

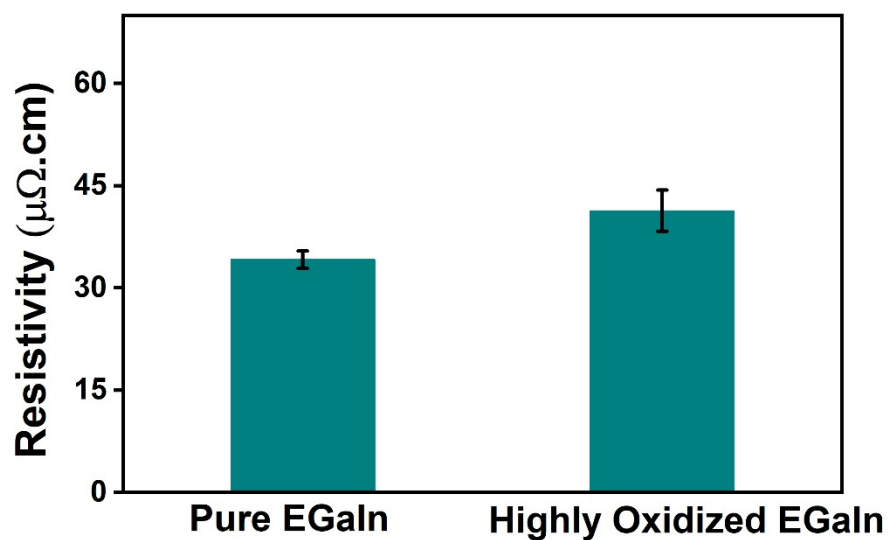

Figure S3. Resistivity values of pure EGaIn and highly oxidized EGaIn.

Table S1. Dielectric constant ( $k$ ) of PGNCs at different GNF wt % at testing frequency 1 kHz. The dielectric values are measured at room temperature.

| GNF wt % | Dielectric Constant |
|----------|---------------------|
| 0        | 2.7                 |

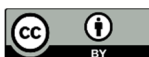

---

|     |       |
|-----|-------|
| 0.5 | 3.24  |
| 1   | 3.53  |
| 1.5 | 3.63  |
| 2   | 3.98  |
| 4   | 4.56  |
| 6   | 6.41  |
| 8   | 10.34 |
| 10  | 31    |
| 12  | 35    |

---

### Supplementary Video List

**Video S1.** Adhesion test of a tiny droplet of EGaIn on the surface of PGNC@6 wt % by tilting.
